# Supplementary material for: MEST Regulates the Stemness of Human Periodontal Ligament Stem Cells
Source: PubMed Central journal article supplement (PMC7366229; doi:10.1155/2020/9672673), 2020-07-08

# SUPPLEMENTAL FIGURE 1

(a)

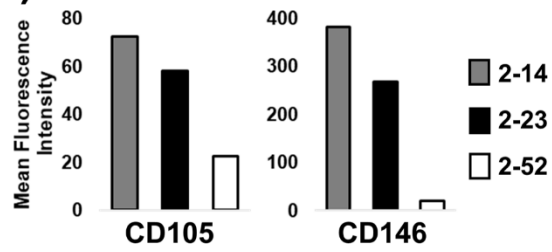

(b)

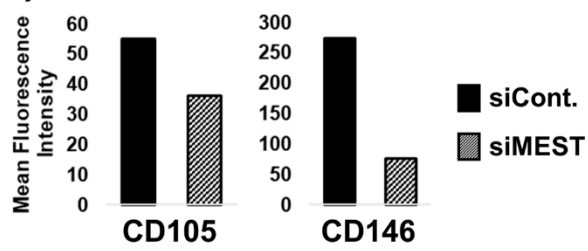

(c)

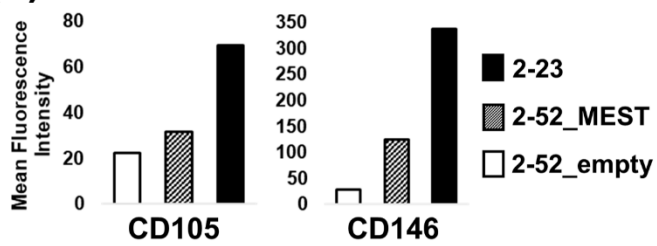

Supplement: 9672673.f1.pdf [file 9672673.f1.pdf]
